# Supplementary material for: Targeting Extracellular RNA Mitigates Hepatic Lipotoxicity and Liver Injury in NASH
Source: Preprints.org preprint supplement (doi:10.20944/preprints202306.1436.v1), 2023-06-20
Supplement: Supplementary file 1 [file supplementary]

### Supplementary Figures

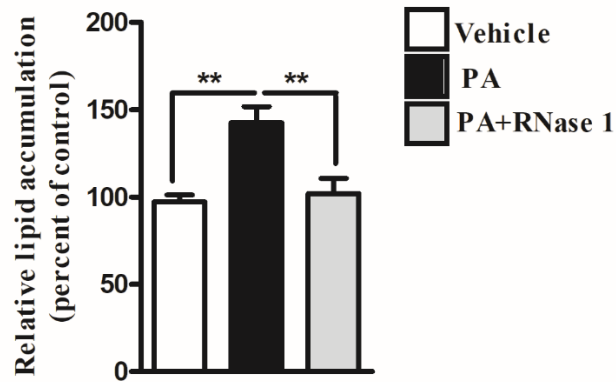

#### **Supplementary Figure 1. eRNA release causes lipid accumulation in hepatocytes.**

Oil Red O staining showing % lipid accumulation in hepatocytes in different experimental groups (Vehicle, PA, PA+RNase 1). Values are mean  $\pm$  SEM,  $n=5$ , \*\* $p < 0.01$ , PA is compared to Vehicle and PA +RNase 1.

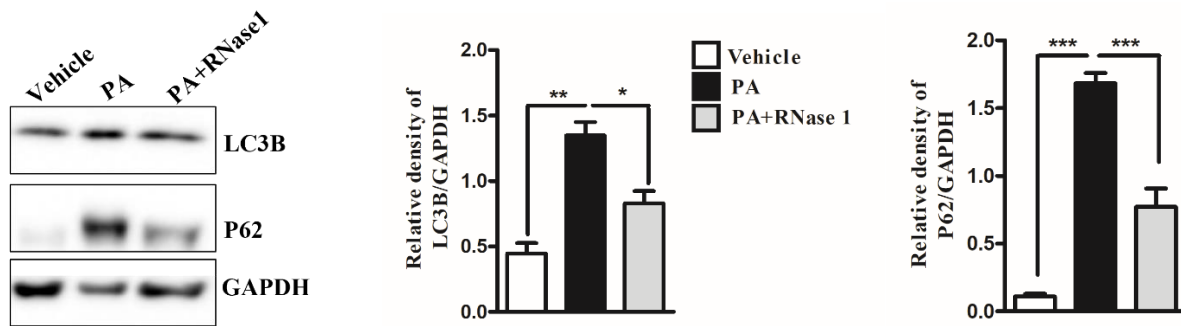

#### **Supplementary Figure 2. RNase1 mitigates lipotoxicity induced autophagy block.**

Representative immunoblots and densitometric analysis showing protein levels of LC3B and p62 in different experimental groups. Values are mean  $\pm$  SEM;  $n=5$ , \*\* $p < 0.01$ , compares Vehicle to PA and \* $p < 0.05$  compares PA to PA+ RNase 1.

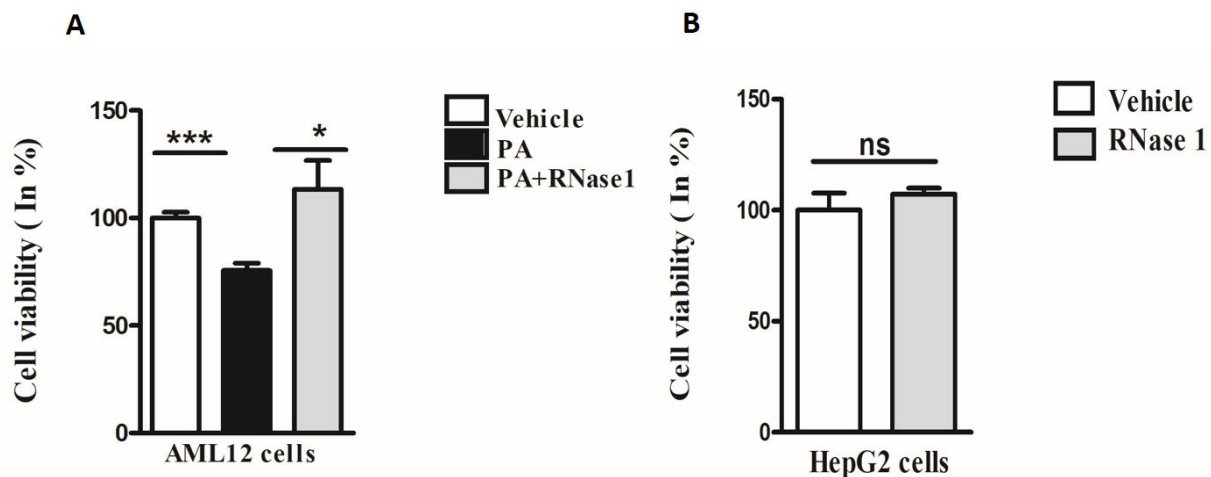

**Supplementary Figure 3. Effect of RNase 1 on hepatic cell viability (A)** % Cell viability shown through MTT assay among Vehicle, PA and PA+RNase1 treated AML12 cells. Data presented as mean  $\pm$  SEM,  $n=5$ , \*\*\* $p < 0.001$  compares VC to PA and \* $p < 0.05$  compares PA to PA+ RNase 1. **(B)** % Cell viability shown through MTT assay among Vehicle and RNase1 alone treated HepG2 cells. Data presented as mean  $\pm$  SEM,  $n=5$ , ns indicates non-significant change between the two groups.

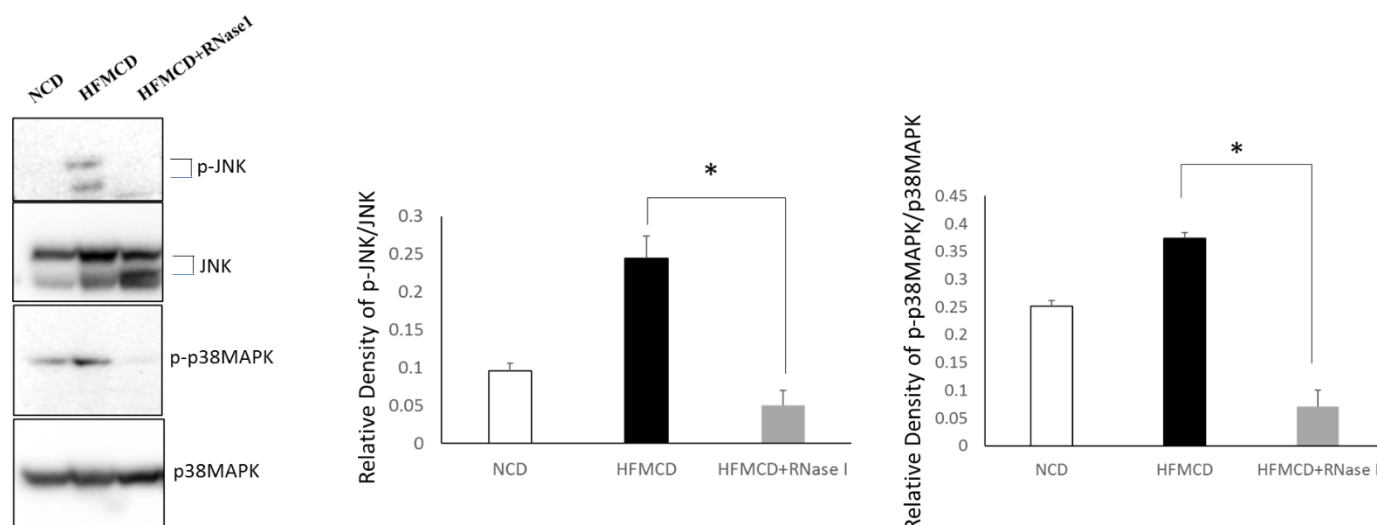

#### Supplementary Figure 4. Effect of RNase 1 on NASH induced stress in mouse liver

Representative immunoblots and densitometric analysis showing protein levels of p-JNK and p-p38MAPK in different experimental groups. Data presented as mean  $\pm$  SEM, n=5, \*p < 0.05 compares HFMCD to HFMCD+ RNase 1.

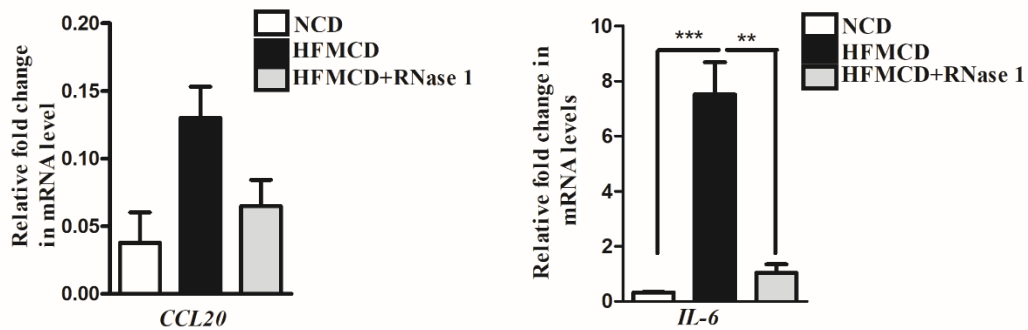

#### Supplementary Figure 5. RNase 1 administration reduces NASH induced liver inflammation.

qRT-PCR analysis showing expression levels of CCL20 and IL6 in the livers of mice fed with NCD, HFMCD diet or HFMCD diet + RNase1. Values are mean  $\pm$  SEM, n=5, \*\*p < 0.01, HFMCD is compared to HFMCD+RNase1 and \*\*\*p<.001, NCD is compared to HFMCD.
